# Supplementary material for: Occupational Exposure and Determinants of Heavy Metal Accumulation in Welders: A Biomonitoring Study in Arba Minch Town, Ethiopia
Source: Research Square preprint supplement (doi:10.21203/rs.3.rs-6588460/v1), 2025-07-18
Supplement: Supplementary file 1 [file 062d95a545ef40d960123ceb.docx]

| Metal | Wavelength  (nm) | Slit width  (nm) | Lamp current(mA) | Energy (eV) | Flame type |
| --- | --- | --- | --- | --- | --- |
| Pb | 283.2 | 0.7 | 2 | 2.874 | Air-acetylene flame |
| Cd | 228.8 | 0.7 | 1.5 | 2.572 | Air-acetylene flame |
| Cr | 357.9 | 0.7 | 2 | 2.712 | Air-acetylene flame |
| Mn | 279.5 | 0.7 | 3 | 3.913 | Air-acetylene flame |
| Ni | 341.5 | 0.2 | 7 | 2.624 | Air-acetylene flame |
| Cu | 324.7 | 0.7 | 1.5 | 3.938 | Air-acetylene flame |

**Supplementary file**

**Table S1:** Instrument operating conditions for determination of heavy metals by FAAS

**Table S2**: Method validation parameters for determination of heavy metals in fingernail samples

| Heavy Metals | IDL(mg/l) | MDL (mg/l) | MQL (mg/l) | R2 | Linear regression  Y= mx+b |
| --- | --- | --- | --- | --- | --- |
| Pb | 0.04 | 0.202 | 0.403 | 0.9998 | y = 0.0276x - 0.0002 |
| Cd | 0.005 | 0.064 | 0.213 | 0.9987 | y = 0.028x + 0.0006 |
| Mn | 0.003 | 0.12 | 0.295 | 0.9995 | y = 0.1115x - 0.0009 |
| Cr | 0.04 | 0.044 | 0.149 | 0.9989 | y = 0.0182 +0.0006 |
| Ni | 0.02 | 0.177 | 0.415 | 0.9999 | y = 0.0272x + 0.0003 |
| Cu | 0.005 | 0.348 | 0.774 | 0.9994 | y = 0.1634x - 0.0004 |

Note: The terms IDL, MDL, and MQL refer to the instrumental detection limit, method detection limit, and quantification limit of heavy metals, respectively. The linear regression equation and R² values are derived from the calibration curves prepared for the five heavy metals: Pb, Cd, Mn, Cr, Ni, and Cu.

**Table S3** Recovery and Precision test for fingernail samples spiked with heavy metals

| Heavy metals | CUS  mg/l (n=3) | Conc. added  mg/L | CSS  mg/L(n= 3) | %R (Mean) | SDV | %RSD |
| --- | --- | --- | --- | --- | --- | --- |
| Pb | 0.15 | 0.1 | 0.249 | 99.33 | 1.25 | 1.26 |
| Ni | 0.06 | 0.03 | 0.091 | 104.4 | 4.16 | 3.98 |
| Mn | 0.054 | 0.1 | 0.156 | 102 | 3.56 | 3.49 |
| Cd | 0.004 | 0.1 | 0.103 | 99.67 | 2.055 | 2.06 |
| Cu | 0.25 | 0.1 | 0.361 | 102.7 | 7.134 | 6.95 |
| Cr | ND | 0.2 | 0.197 | 98.33 | 4.48 | 4.55 |

Where CUS: concentration of unspiked sample, CSS: concentration of spiked sample

%RSD: Percent of relative standard deviation
